# Supplementary material for: Lactobacillus rhamnosus 069 and Lactobacillus brevis 031: Unraveling Strain-Specific Pathways for Modulating Lipid Metabolism and Attenuating High-Fat-Diet-Induced Obesity in Mice
Source: PubMed Central journal article supplement (PMC11223209; doi:10.1021/acsomega.4c02514), 2024-05-16
Supplement: ao4c02514_si_001.pdf [file ao4c02514_si_001.pdf]

***Lactobacillus rhamnosus* 069 and *Lactobacillus brevis* 031: Unraveling Strain-Specific Pathways for Modulating Lipid Metabolism and Attenuating High-Fat Diet induced Obesity in Mice**

Pin-Yu Ho<sup>§</sup>, Ya-Chun Chou<sup>§</sup>, Yen-Chun Koh<sup>§</sup>, Wei-Sheng Lin<sup>§, †</sup>, Wei-Jen Chen<sup>\</sup>, Ai-Lun Tseng<sup>\</sup>, Chiau-Ling Gung<sup>\</sup>, Yu-Shan Wei<sup>\</sup>, and Min-Hsiung Pan <sup>§, £, ¶, \*</sup>

<sup>§</sup> Institute of Food Science and Technology, National Taiwan University, No. 1, Sec. 4, Roosevelt Road, Taipei 10617, Taiwan, ROC

<sup>†</sup> Department of Food Science, National Quemoy University, Quemoy County 89250, Taiwan, ROC

<sup>\</sup> Syngen Biotech Co., Ltd., Building A, No. 154, Kaiyuan Rd., Sinying, Tainan 73055, Taiwan

<sup>£</sup> Department of Public Health, China Medical University, 91, Hsueh-Shih Road, Taichung 40402, Taiwan, ROC

<sup>¶</sup> Department of Food Nutrition and Health Biotechnology, Asia University, 500, Lioufeng Rd., Wufeng, Taichung 41354, Taiwan, ROC

**\* Please send all correspondence to:**

Dr. Min-Hsiung Pan

Institute of Food Science and Technology,

National Taiwan University,

No. 1, Section 4, Roosevelt Road, Taipei 10617, Taiwan.

Tel. no. +886-2-33664133

Fax. no. +886-2-33661771

E-mail: mhpan@ntu.edu.tw

Table S1. Effect of LR069 and LB031 on initial body weight, final body weight, body weight gain, and food intake in HFD-fed mice.

|                         | ND                        | HFD                       | LR069                      | LB031                      |
|-------------------------|---------------------------|---------------------------|----------------------------|----------------------------|
| Initial body weight (g) | 19.64 ± 1.34 <sup>a</sup> | 20.08 ± 0.63 <sup>a</sup> | 20.13 ± 1.26 <sup>a</sup>  | 20.05 ± 1.37 <sup>a</sup>  |
| Final body weight (g)   | 28.30 ± 0.99 <sup>c</sup> | 32.47 ± 2.23 <sup>a</sup> | 30.20 ± 2.29 <sup>b</sup>  | 30.99 ± 2.15 <sup>ab</sup> |
| Body weight gain (g)    | 8.66 ± 1.35 <sup>c</sup>  | 12.39 ± 2.12 <sup>a</sup> | 10.07 ± 2.01 <sup>bc</sup> | 11.01 ± 1.73 <sup>ab</sup> |
| Food intake (g/day)     | 3.02 ± 0.44 <sup>a</sup>  | 2.94 ± 0.25 <sup>a</sup>  | 3.09 ± 0.42 <sup>a</sup>   | 3.08 ± 0.40 <sup>a</sup>   |

Data are expressed as mean ± SEM. The significance of difference among four groups was analyzed by one-way ANOVA and Duncan's multiple range tests. The values with different letters (a-c) are significantly different ( $p < 0.05$ ) between each group.

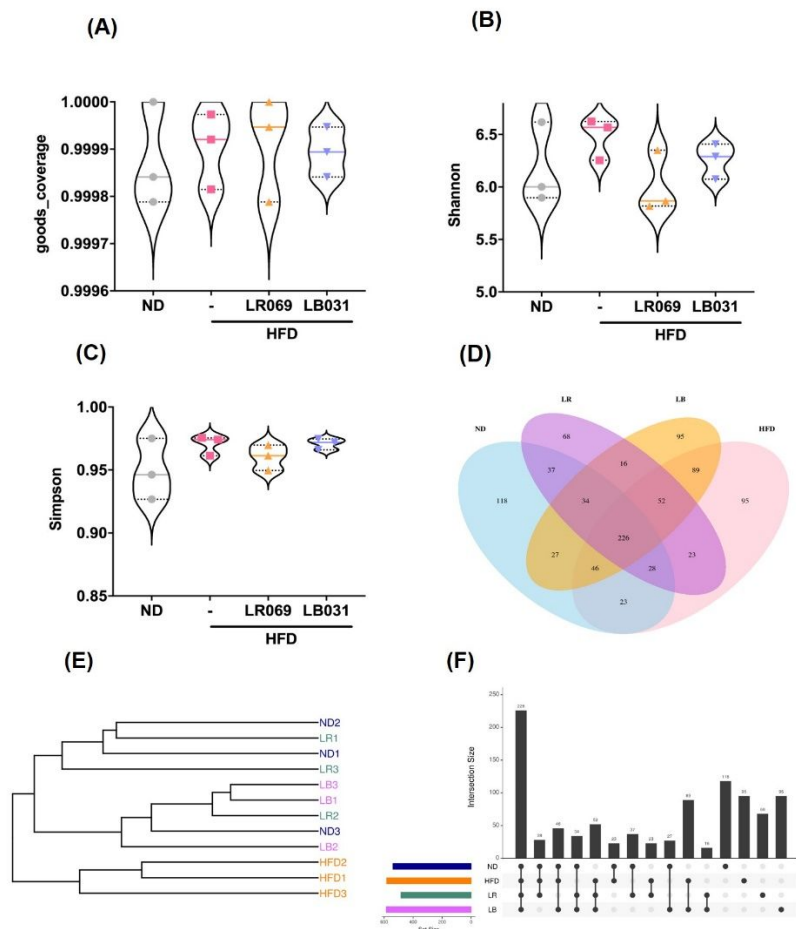

Figure S1. Effect of LR069 and LB031 changed the gut microbiota composition in HFD-fed mice. (A) goods\_coverage. (B) Simpson. (C) Shannon. (D) Venn diagram. (E) UpSet plot. (F) UPGMA. (Unweighted Paired-Group Method Using Arithmetic Means). n= 3 for each analysis, LR=LR069, LB= LB031.
